# Supplementary material
Source: Frontiers journal article supplement (https://www.frontiersin.org/articles/385657)
Supplement: Image_2.PDF [file Image_2.PDF]

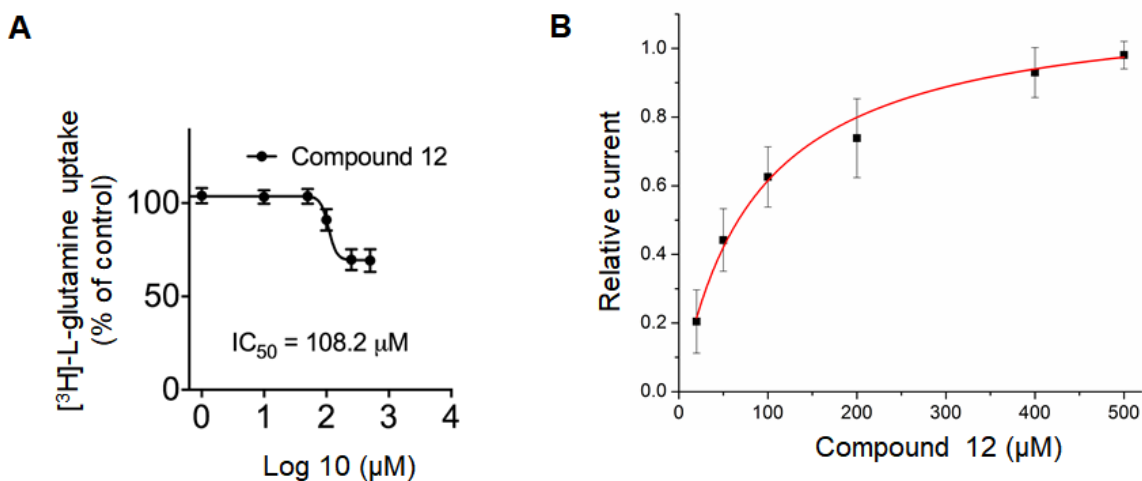

**Supplementary Figure 2.** (A) IC<sub>50</sub> calculation SK-MEL-28 cells were incubated in the presence of Compound **12** (ZINC ID 69707916) at a range of concentrations. Uptake of [<sup>3</sup>H]-L-glutamine was assessed over 15 minutes, log transformed and IC<sub>50</sub> determined using a Non-linear fit (log[inhibitor] vs response, variable slope, four parameters; GraphPad Prism). Data are the mean +/- standard error of the mean of 4 experiments per concentration. (B) Dose response curve for compound **12**, the red line is a fit to a one-site binding equation with an IC<sub>50</sub> of 108 μM. The internal solution contained 130 mM NaSCN and 10 mM alanine, the external solution 140 mM NaCl (Methods).
